# Supplementary material
Source: Springer Nature journal article supplement (https://www.springermedizin.de/resource/supplementary/12877_2012_809_MOESM1_ESM.pdf/9440622)
Supplement: MOESM1 [file 9440622]

# Contents of the TAKE10!® booklet

- How to use this booklet
- Before starting the exercise
- When you go for a walk
- Eat many kinds of foods
- Let's start the TAKE10!® Exercise!
- The 1st day Learn it!
- The 2nd day Learn it!
  - Eat 10 different food groups a day
- The 3rd day Learn it!
  - Enjoy your diet with someone else
- The 4th day Learn it!
  - Dietary guidelines for long and happy life
- The 5th day Learn it!
- The 6th day Learn it!
  - Use a microwave oven
- The 7th day Learn it!
  - Don't be embarrassed about incontinence
- The 8th day Try it! On the floor
  - Chewing and swallowing to enjoy your meal
- The 9th day Try it!
  - While watching TV
  - Tongue exercise to enjoy your meal
- The 10th day Gaining more understanding
  - Let's take a walk
  - Recommendations for safe food preservation
  - Food with health claims
- TAKE10!® Check Sheet
- Examples for 10 foods groups
- TAKE10!® Calendar
- Ms. Tenko's upgraded version
